# Supplementary material for: Validity of Web-Based Self-Reported Weight and Height: Results of the Nutrinet-Santé Study
Source: PubMed Central journal article supplement (PMC3742400; doi:10.2196/jmir.2575), 2013-08-08
Supplement: jmir_v15i8e152_app1.pdf [file jmir_v15i8e152_app1.pdf]

**Supplementary table.** Statistical analyses for validity and concordance of anthropometrics, NutriNet Santé Study, France, 2012.

|                                                                                                                                                                                                                                                                                                                                                                                                                                                                                                                                                                                                      |                                                                                                                                                                                                                                                                                                                                                                                                                                                                                                                                                                                          |
|------------------------------------------------------------------------------------------------------------------------------------------------------------------------------------------------------------------------------------------------------------------------------------------------------------------------------------------------------------------------------------------------------------------------------------------------------------------------------------------------------------------------------------------------------------------------------------------------------|------------------------------------------------------------------------------------------------------------------------------------------------------------------------------------------------------------------------------------------------------------------------------------------------------------------------------------------------------------------------------------------------------------------------------------------------------------------------------------------------------------------------------------------------------------------------------------------|
| VALIDITY (one of the measures is a gold standard)<br>Gold-standard=measured weight/height                                                                                                                                                                                                                                                                                                                                                                                                                                                                                                            | CONCORDANCE (between two self-reports)<br>Agreement between web-based and face-to-face self-report                                                                                                                                                                                                                                                                                                                                                                                                                                                                                       |
| <b>CONTINUOUS VARIABLES: weight, height, BMI</b>                                                                                                                                                                                                                                                                                                                                                                                                                                                                                                                                                     |                                                                                                                                                                                                                                                                                                                                                                                                                                                                                                                                                                                          |
| Difference reported R – measured M:<br>- Paired t-test (on log transformed variables)<br>- Wilcoxon signed rank test of difference                                                                                                                                                                                                                                                                                                                                                                                                                                                                   | Difference web W - face-to-face F:<br>- Paired t-test (on log transformed variables)<br>- Wilcoxon signed rank test of difference                                                                                                                                                                                                                                                                                                                                                                                                                                                        |
| IntraClass Correlation Coefficient (ICC):<br>measure of agreement between two methods for the same subject. Random effect ICC(2,1) as named by Shrout and Fleiss.<br>Does not take into account the fact that one of the data is the gold standard.                                                                                                                                                                                                                                                                                                                                                  | IntraClass Correlation Coefficient (ICC):<br>measure of agreement between W and F for the same subject. Random effect ICC.                                                                                                                                                                                                                                                                                                                                                                                                                                                               |
| Method of Bland and Altman: Plot of the difference R-M on the average (R + M)/2.<br>- Mean difference (requires the normality of differences): if not equal to 0 (or 100% if log transformation), reveals presence of systematic bias :<br>- >0 (or >100%): overreporting, i.e. R>M<br>- <0 (or <100%): underreporting, i.e. R<M<br>- Limits of agreement (LOA) = mean difference $\pm$ 2 SD difference. Represents variation interval of the differences for clinical interpretation.<br>- Regression line: Assessment of proportional bias if beta different from zero (CI does not include zero). | Method of Bland and Altman: Plot of the difference W-F on the average (W + F)/2.<br>- Mean difference (requires the normality of differences): if not equal to 0 (or 100% if log transformation), reveals presence of systematic bias :<br>- >0 (or >100%): overreporting W>F<br>- <0 (or <100%): underreporting W<F<br>- Limits of agreement (LOA) = mean difference $\pm$ 2 SD difference. Represents variation interval of the differences for clinical interpretation.<br>- Regression line: Assessment of proportional bias if beta different from zero (CI does not include zero). |
| Multivariate linear regression analyses differences [R-M] as the dependent variable and potential confounders as independent variables (age, sex, smoking status, corpulence, physical activity, education, income, occupation).                                                                                                                                                                                                                                                                                                                                                                     |                                                                                                                                                                                                                                                                                                                                                                                                                                                                                                                                                                                          |
| <b>CATEGORICAL VARIABLES: BMI classification (normal weight, overweight</b>                                                                                                                                                                                                                                                                                                                                                                                                                                                                                                                          |                                                                                                                                                                                                                                                                                                                                                                                                                                                                                                                                                                                          |

| <b><i>excluding obesity, obese)</i></b>                                                                                                    |                                                                                    |
|--------------------------------------------------------------------------------------------------------------------------------------------|------------------------------------------------------------------------------------|
| Percentage of agreement between R and M BMI classification.                                                                                | Percentage of agreement between W and F reported BMI classification.               |
| Weighted kappa                                                                                                                             | Weighted kappa                                                                     |
| <b><i>BINARY VARIABLES : overweight including obesity (yes/no), obese (yes/no)</i></b>                                                     |                                                                                    |
| Sensitivity and Specificity:<br>Truth (gold standard) = measured anthropometric.<br>Sensitivity= $TP/(TP+FN)$<br>Specificity= $TN/(TN+FP)$ |                                                                                    |
| Mc Nemar Chi square test : tests if the difference in classification is significant                                                        | McNemar Chi square test : tests if the difference in classification is significant |

Abbreviations: CI, Confidence Interval; F, face-to-face; FN, False Negatives; FP, False Positives; LOA, Limits of Agreement; M, measured; R, reported; TP, True Positives; TN, True Negatives; W, web-based;
