# Supplementary material for: Validity of Web-Based Self-Reported Weight and Height: Results of the Nutrinet-Santé Study
Source: PubMed Central journal article supplement (PMC3742400; doi:10.2196/jmir.2575), 2013-08-08
Supplement: jmir_v15i8e152_app2.pdf [file jmir_v15i8e152_app2.pdf]

**Supplemental Table 2. Difference between web-based self-report and measured anthropometrics according to BMI classification and age class, by sex, NutriNet-Santé study, France 2012.**

|                             | Men n=678                       |                          |                                       | Women n=1835                    |                          |                                       |
|-----------------------------|---------------------------------|--------------------------|---------------------------------------|---------------------------------|--------------------------|---------------------------------------|
|                             | Difference web-based - measured |                          |                                       | Difference web-based - measured |                          |                                       |
|                             | Weight (kg) <sup>a</sup>        | Height (cm) <sup>a</sup> | BMI (kg/m <sup>2</sup> ) <sup>a</sup> | Weight (kg) <sup>a</sup>        | Height (cm) <sup>a</sup> | BMI (kg/m <sup>2</sup> ) <sup>a</sup> |
| <b>Total</b>                | -0.35 ± 1.43                    | 0.61 ± 1.40              | -0.31 ± 0.66                          | -0.47 ± 1.38                    | 0.55 ± 2.66              | -0.33 ± 1.66                          |
| <b>BMI classification</b>   |                                 |                          |                                       |                                 |                          |                                       |
| Normal                      | -0.11 ± 1.30                    | 0.31 ± 1.29              | -0.12 ± 0.50                          | -0.39 ± 1.30                    | 0.43 ± 1.41              | -0.26 ± 0.61                          |
| Overweight                  | -0.68 ± 1.37                    | 0.85 ± 1.32              | -0.49 ± 0.62                          | -0.75 ± 1.48                    | 0.67 ± 4.04              | -0.41 ± 3.00                          |
| Obese                       | -0.75 ± 2.05                    | 1.17 ± 1.87              | -0.69 ± 1.09                          | -0.93 ± 1.79                    | 1.10 ± 4.67              | -0.74 ± 2.45                          |
| <i>p-value</i> <sup>b</sup> | <.0001                          | <.0001                   | <.0001                                | .004                            | .03                      | .0006                                 |
| <b>Age</b>                  |                                 |                          |                                       |                                 |                          |                                       |
| 18-25y                      | -0.60 ± 2.07                    | 0.00 ± 2.35              | -0.28 ± 0.70                          | -0.42 ± 1.38                    | 0.27 ± 0.98              | -0.23 ± 0.59                          |
| 25-35y                      | 0.02 ± 1.65                     | 0.25 ± 1.43              | -0.07 ± 0.69                          | -0.36 ± 1.57                    | 0.22 ± 1.25              | -0.19 ± 0.68                          |
| 35-45y                      | -0.20 ± 1.25                    | 0.31 ± 1.25              | -0.15 ± 0.52                          | -0.55 ± 1.52                    | 0.27 ± 1.186             | -0.29 ± 0.75                          |
| 45-55y                      | -0.29 ± 1.53                    | 0.29 ± 1.31              | -0.19 ± 0.61                          | -0.54 ± 1.34                    | 0.37 ± 3.20              | -0.28 ± 1.65                          |
| 55-65y                      | -0.44 ± 1.41                    | 0.63 ± 1.30              | -0.35 ± 0.66                          | -0.54 ± 1.43                    | 0.76 ± 1.58              | -0.45 ± 0.76                          |
| ≥65y                        | -0.54 ± 1.44                    | 0.88 ± 1.50              | -0.45 ± 0.69                          | -0.58 ± 1.29                    | 0.83 ± 4.52              | -0.38 ± 3.37                          |
| <i>p-value</i> <sup>c</sup> | .15                             | .0006                    | .0002                                 | .80                             | .04                      | .05                                   |

<sup>a</sup> Values are mean ± SD

<sup>b</sup> *p*-value of the effect of BMI category on the log-transformed difference

<sup>c</sup> *p*-value of the effect of age category on the log-transformed difference
