# Supplementary material for: Validity of Web-Based Self-Reported Weight and Height: Results of the Nutrinet-Santé Study
Source: J Med Internet Res. 2013 Aug 8;15(8):e152. doi: 10.2196/jmir.2575 (PMC3742400; doi:10.2196/jmir.2575)
Supplement: Supplementary file 3 [file jmir_v15i8e152_app3.pdf]

**Supplemental Table 3.** Sensitivity analyses among subsample with a time lag between web-based self-report and measurement < 2 months, NutriNet-Santé study, France, 2012

| Validity n=2 079         |           |       |              |       |               |           |                             |             |                |                            |             |                            |            |
|--------------------------|-----------|-------|--------------|-------|---------------|-----------|-----------------------------|-------------|----------------|----------------------------|-------------|----------------------------|------------|
| BMI classification       | Web-based |       | Measured     |       | Agreement (%) |           | Weighted Kappa <sup>a</sup> |             | P <sup>b</sup> | Sensitivity <sup>c,d</sup> |             | Specificity <sup>c,e</sup> |            |
|                          | n         | %     | n            | %     | %             | 95% CI    | κ                           | 95% CI      |                | Se                         | 95% CI      | Spe                        | 95% CI     |
|                          |           |       |              |       | 95.0          | 94.1-95.9 | 0.92                        | 0.91 - 0.94 |                |                            |             |                            |            |
|                          |           |       |              |       |               |           |                             |             |                |                            |             |                            |            |
|                          |           |       |              |       |               |           |                             |             |                |                            |             |                            |            |
| Normal (BMI<25)          | 1387      | 66.71 | 1377         | 66.23 |               |           |                             |             |                |                            |             |                            |            |
| Overweight (BMI 25-29.9) | 478       | 22.99 | 484          | 23.28 |               |           |                             |             | .30            | 0.91                       | 0.89 - 0.93 | 0.99                       | 0.98 - 1.0 |
| Obese (BMI≥30)           | 214       | 10.29 | 218          | 10.49 |               |           |                             |             | .57            | 0.91                       | 0.87 - 0.95 | 1.00                       | 0.99 - 1.0 |
|                          | Web-based |       | Measured     |       | Difference    |           | P <sup>f</sup>              |             |                | ICC <sup>g</sup>           |             |                            |            |
|                          | Mean      | SD    | Mean         | SD    | Mean          | SD        |                             |             |                | ICC                        | 95% CI      |                            |            |
|                          |           |       |              |       |               |           |                             |             |                |                            |             |                            |            |
|                          |           |       |              |       |               |           |                             |             |                |                            |             |                            |            |
|                          |           |       |              |       |               |           |                             |             |                |                            |             |                            |            |
| Weight (kg)              | 67.13     | 14.17 | 67.76        | 14.38 | -0.62         | -0.72     | <.0001                      |             |                | 0.988                      | 0.987-0.989 |                            |            |
| Height (cm)              | 166.81    | 8.46  | 166.26       | 8.45  | 0.55          | 0.49      | <.0001                      |             |                | 0.984                      | 0.983-0.986 |                            |            |
| BMI (kg/m²)              | 24.19     | 4.56  | 24.22        | 4.52  | -0.03         | -0.06     | .01                         |             |                | 0.986                      | 0.985-0.987 |                            |            |
| Concordance n=233        |           |       |              |       |               |           |                             |             |                |                            |             |                            |            |
| BMI classification       | Web-based |       | Face to face |       | Agreement (%) |           | Weighted Kappa <sup>a</sup> |             | P <sup>b</sup> |                            |             |                            |            |
|                          | n         | %     | n            | %     | %             | 95% CI    | κ                           | 95% CI      |                |                            |             |                            |            |
|                          |           |       |              |       | 94.0          | 90.9-97.0 | 0.87                        | 0.82 - 0.92 |                |                            |             |                            |            |
|                          |           |       |              |       |               |           |                             |             |                |                            |             |                            |            |
|                          |           |       |              |       |               |           |                             |             |                |                            |             |                            |            |
| Normal (BMI<25)          | 141       | 60.52 | 149          | 63.95 |               |           |                             |             |                |                            |             |                            |            |
| Overweight (BMI 25-29.9) | 69        | 29.61 | 64           | 27.47 |               |           |                             |             | .18            |                            |             |                            |            |
| Obese (BMI≥30)           | 23        | 9.87  | 20           | 8.58  |               |           |                             |             | .38            |                            |             |                            |            |
|                          | Web-based |       | Face to face |       | Difference    |           | P <sup>f</sup>              |             |                | ICC <sup>g</sup>           |             |                            |            |
|                          | Mean      | SD    | Mean         | SD    | Mean          | SD        |                             |             |                | ICC                        | 95% CI      |                            |            |
|                          |           |       |              |       |               |           |                             |             |                |                            |             |                            |            |
|                          |           |       |              |       |               |           |                             |             |                |                            |             |                            |            |
|                          |           |       |              |       |               |           |                             |             |                |                            |             |                            |            |
| Weight (kg)              | 66.26     | 12.56 | 65.94        | 12.50 | 0.33          | 1.71      | .01                         |             |                | 0.990                      | 0.986-0.993 |                            |            |
| Height (cm)              | 165.91    | 7.74  | 165.87       | 7.87  | 0.03          | 0.87      | .54                         |             |                | 0.993                      | 0.991-0.995 |                            |            |
| BMI (kg/m²)              | 24.19     | 4.19  | 23.92        | 4.05  | 0.27          | 0.75      | <.0001                      |             |                | 0.981                      | 0.975-0.985 |                            |            |

<sup>a</sup> Cicchetti-Allison weight. For a given cell in row *i*, column *j*,  $W_{ij}=1-|i-j|/2$

<sup>b</sup> *P*-value of McNemar  $\chi^2$  test for binary variables: overweight including obesity (BMI≥25) yes/no and obese (BMI≥30) yes/no. A *p*-value lower than 0.05 indicates significant difference between web-based self-reporting and measurement.

<sup>c</sup> Sensitivity and Specificity for binary variables: overweight including obesity (BMI≥25) and obese (BMI≥30).

<sup>d</sup> Sensitivity=True Positives/(True positives + False negatives).

<sup>e</sup> Specificity=True Negatives / (True Negatives + False positives). Truth = clinical data. SD=[ $p(1-p)/n$ ]<sup>1/2</sup> Confidence interval is calculated as sensitivity±1.96\*SD

<sup>f</sup> *P*-value of the paired t-test of difference of log-transformed variable (“Web minus face-to-face”)

<sup>g</sup> ICC(2,1) calculated on log transformed variables
